# Supplementary material for: Recombinant Porcine Interferon-α Decreases Pseudorabies Virus Infection
Source: MDPI journal article supplement (doi:10.3390/vaccines11101587), 2023-10-12
Supplement: s1 [file s1]

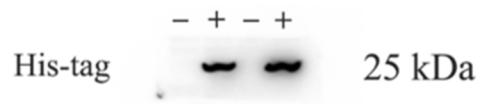

**Figure S1.** Identification of recombinant protein.

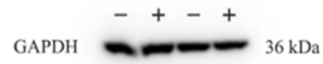

**Figure S2.** Internal reference for the identification of recombinant protein.

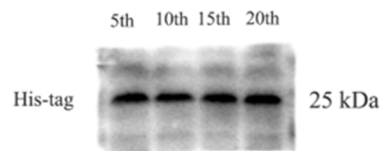

**Figure S3.** Identification of stable expression.

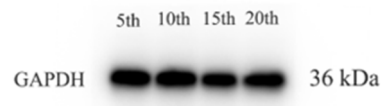

**Figure S4.** Internal reference for the identification of stable expression.
